# Supplementary material for: Built-in electric field triggered interfacial electron accumulation and structural reconstruction for boosting ampere-level-current seawater oxidation
Source: Royal Society of Chemistry journal article supplement (doi:10.1039/d5qi02143j), 2026-01-01
Supplement: d5qi02143j1.pdf [file d5qi02143j1.pdf]

# Built-in Electric Field Triggered Interfacial Electron Accumulation and Structural Reconstruction for Boosting Ampere-Level-Current Seawater Oxidation

## *Supplementary information*

### List of contents

#### 1. Experimental section

- 1.1 Materials
- 1.2 Treatment of FNF
- 1.3 Fabrication of  $\text{Fe}(\text{OH})_3/\text{FNF}$  electrode
- 1.4 Fabrication of  $\text{IrO}_2/\text{FNF}$  electrode
- 1.5 Fabrication of  $\text{Ni}(\text{OH})_2/\text{FNF}$  electrode
- 1.6 General characterizations
- 1.7 Electrochemical characterization
- 1.8 DFT calculation details

#### 2. Supplementary figures

- Figure S1. Preparation process of the large-scale  $\text{Ni-Fe}(\text{OH})_3/\text{FNF}$
- Figure S2. SEM images of  $\text{Ni-Fe}(\text{OH})_3/\text{FNF}$
- Figure S3. OER performance of  $\text{Ni-Fe}(\text{OH})_3/\text{FNF}$
- Figure S4. Selected region of  $\text{Ni-Fe}(\text{OH})_3/\text{FNF}$ -12
- Figure S5. LSV curves of selected region of  $\text{Ni-Fe}(\text{OH})_3/\text{FNF}$ -12
- Figure S8. OER performance of  $\text{Ni-Fe}(\text{OH})_3/\text{FNF}$  in different electrolyte
- Figure S9. ClO test for the electrolyte
- Figure S10. Gas contact angle of electrodes
- Figure S11. OER mechanism of  $\text{FeOOH}$  at Fe sites
- Figure S12. OER mechanism of  $\text{Ni-FeOOH}$  at Fe sites
- Table S1 The XPS peak parameters of  $\text{Ni-Fe}(\text{OH})_3$  and  $\text{Fe}(\text{OH})_3$
- Table S2 Compared with other recent reported OER electrodes

#### 1. Experimental Section

##### 1.1 Materials

Nickel sulfate heptahydrate ( $\text{NiSO}_4 \cdot 7\text{H}_2\text{O}$ , AR, 98.0%), Nickel nitrate hexahydrate ( $\text{Ni}(\text{NO}_3)_2 \cdot 6\text{H}_2\text{O}$ , AR, 98.0%), Ferric nitrate nonahydrate ( $\text{Fe}(\text{NO}_3)_3 \cdot 9\text{H}_2\text{O}$ , AR, 98.5%), acetone ( $\text{C}_3\text{H}_6\text{O}$ , 99.5%), ethanol ( $\text{C}_2\text{H}_6\text{O}$ , 99.5%), potassium hydroxide (KOH, 85%), were purchased from Sinopharm Chemical Reagent Co., LTD. Commercial iridium dioxide ( $\text{IrO}_2$ , 99.9%), and Nafion (5 wt%) were purchased from Shanghai Aladdin Biochemical Technology Co., Ltd. The deionized (DI) water used in the solution preparation and washing steps comes from ultrapure water (Milli-Q,  $18 \text{ M}\Omega \cdot \text{cm}$ ) made in the laboratory. Iron-nickel foam (FNF, 1.0 mm, porosity: 110 ppi) was obtained from Kunshan Xingzhenghong Electronic Materials Co., LTD. were used as the substrate. All chemicals were analytical grade and used as received without further purification.

## **1.2 Treatment of iron-nickel foam**

In order to remove the surface oxide layer, a piece of iron-nickel foam (FNF) ( $1 \times 4 \text{ cm}^2$ ) was treated in acetone under ultrasonication for 0.5 h, followed by sonicating several times with ethanol and DI water successively, and finally dried in a vacuum oven at  $60^\circ\text{C}$  for 6 h.

## **1.3 Fabrication of $\text{Fe}(\text{OH})_3/\text{FNF}$ electrode**

For comparative study,  $\text{Fe}(\text{OH})_3/\text{FNF}$  was prepared based on the literature method as follow:[1] 1.414 g (3.5 mmol)  $\text{Fe}(\text{NO}_3)_3 \cdot 9\text{H}_2\text{O}$  was dissolved in 50 mL ethanol. The FNF substrate was immersed in the solution for a duration of 12 h. Subsequently, the FNF was then rinsed extensively several times using deionized water and ethanol, then dried in a vacuum oven ( $60^\circ\text{C}$ , 6h).

## **1.4 Fabrication of $\text{IrO}_2/\text{FNF}$ electrode**

2.1 mg of  $\text{IrO}_2$  powder was dispersed in a mixed solution containing ethanol (1 mL) and Nafion binder (5 wt%, 55  $\mu\text{L}$ ) through ultrasonication to form a homogeneous ink dispersion. The resulting dispersion was uniformly coated onto a pre-treated FNF substrate ( $1 \times 1 \text{ cm}^2$ ), followed drying at  $60^\circ\text{C}$  for 2 h in room.

## **1.5 Fabrication of $\text{Ni}(\text{OH})_2/\text{FNF}$ electrode**

The  $\text{Ni}(\text{OH})_2/\text{FNF}$  was prepared as the literature[2] by electrodeposited method on

FNF. A solution of 0.1 M of  $\text{Ni}(\text{NO}_3)_2$  was used for the electrodeposition. The two-electrode configuration with Pt coil as the reference and FNF (1 cm $\times$ 1 cm) as the working electrode. The electrodeposition was carried out at 1.5 mA cm $^2$  for 160 s. After plating, the electrode was cleaned with deionized water.

### 1.6 General characterizations

The microstructure and phase information of catalysts using X-ray diffraction (XRD, Rigaku Ultima IV, Cu K $\alpha$ ,  $\lambda = 1.54056 \text{ \AA}$ ), field-emission scanning electron microscope (FESEM, JSM-7610F, 15 kV), and Transmission electron microscopy (TEM, JEOL 2010F) with EDS. The surface characteristics were investigated using X-ray photoelectron spectroscopy (XPS, Thermo Fisher Scientific K-Alpha, Mg K $\alpha$ ). Ultraviolet photoelectron spectroscopy (UPS) is performed on Thermo ESCALAB Xi+ equipped with ultraviolet photoelectron spectrometer (Hel (21.22 eV)). In-situ Raman spectroscopy measurements were conducted using a confocal micro-Raman spectrometer (Renishaw inVia) coupled with an electrochemical workstation. The contact angle data of liquid and bubbles were measured using a JY-82B instrument.

### 1.7 Electrochemical test

Electrochemical measurements were conducted using a PARSTAT (P4000) workstation with a three-electrode configuration: Hg/HgO as the reference, graphite as the counter, and prepared samples as the working electrode.

The prepared samples, graphite rod, and a Hg/HgO electrode were used as working, counter, and reference electrode, respectively. The electrolytes is natural alkaline seawater (1 M KOH+SW). Natural seawater was collected from the Bohai bay in China, Qinhuangdao, Shandong, China. The collected natural seawater is firstly filtered by a 0.22  $\mu\text{m}$  filtration membrane, then added KOH, and finally centrifuged to remove sediment and use as seawater electrolyte.

The potentials were converted to the reversible hydrogen electrode (RHE) by the equation:  $E_{\text{RHE}} = E_{\text{Hg/HgO}} + 0.098 + 0.0591 \times \text{pH}$ . The catalytic performances of samples were evaluated using LSV at 5 mV s $^{-1}$ . The LSV curves were calibrated using a 70% solution resistance correction.

All the LSV curves were derived from multiple tests to ensure data consistency. Electrochemical impedance spectroscopy (EIS) was conducted across a frequency from  $10^5$  to  $10^{-2}$  Hz with 5 mV AC amplitude.

The Tafel slope was calculated according to Equation:  $\eta = \alpha + \frac{2.3RT}{\alpha nF} \log|j|$ , where  $\eta$  is the overpotential,  $j$  is the current density,  $\alpha$  is the transfer coefficient,  $n$  is the number of electrons involved in the reaction,  $F$  is the Faradaic constant,  $b = 2.3RT/\alpha nF$  is the value of Tafel slope.

A two-electrode overall seawater splitting (OSWS) electrolyzer equipped with FNF as cathode and Ni-Fe(OH)<sub>3</sub>/FNF anode was constructed. The Faraday efficiency of the electrolyzer is calculated based on the ratio of the volume of collected ( $V_{\text{collected}}$ ) H<sub>2</sub>/O<sub>2</sub> evolved to the calculated one ( $V_{\text{calculated}}$ ):

$$\text{Faraday efficiency} = \frac{V_{\text{collected}}}{V_{\text{calculated}}} \times 100\%$$

The actual volumes of generated H<sub>2</sub>/O<sub>2</sub> gas were gathered using the drainage method at constant 1.7 V with a current density of 50 mA cm<sup>-2</sup>. The theoretical volume can be calculated by the formula:

$$V_{\text{calculated}} = \frac{I \cdot t \cdot V_m}{n \cdot F}$$

where  $I$  is current density (A),  $t$  is time (s),  $V_m$  is molar volume of H<sub>2</sub>/O<sub>2</sub> gas (22.4 L mol<sup>-1</sup>, in Hanzhong, Shaanxi),  $F$  is the Faraday constant (96485 C mol<sup>-1</sup>),  $n$  is electron number transferred per molecule ( $n$  is 2 and 4 for HER and OER, respectively).

### 1.8 DFT calculation details

All the calculations were performed within the framework of density functional theory (DFT) using the projector augmented plane-wave method, as implemented in the Vienna ab initio simulation package (VASP).[3, 4] The generalized gradient approximation proposed by Perdew-Burke-Ernzerhof was selected for the calculation of exchange-correlation potentials. [5]The cutoff energy for plane waves was set to 400 eV. The energy criterion was set to be  $10^{-5}$  eV for obtaining the iterative solution of the

Kohn-Sham equation. A  $3 \times 3 \times 1$  k-mesh was used for the structural optimizations of Ni-FeOOH, FeOOH.

A 15 Å vacuum region was set in the z-direction to prevent interactions between two adjacent surfaces. The force and convergence thresholds for energy were less than 0.02 eV Å<sup>-1</sup> and 10<sup>-5</sup> eV, respectively. During the calculations, the bottom layers of the structures were fixed. The reaction Gibbs free energy ( $\Delta G$ ) of the intermediates was determined using  $\Delta G = \Delta E + \Delta ZPE - T\Delta S$ , where T is the temperature (298.15 K),  $\Delta ZPE$  is zero-point energy,  $\Delta E$  is the reaction energy, and  $\Delta S$  is the entropy difference calculated from the vibration frequency. The entropies of H<sub>2</sub>O vapor under standard conditions were obtained from the NIST database. The computational conditions employed to construct the OER configuration are 0 V vs. NHE.

## 2. Supplementary figures

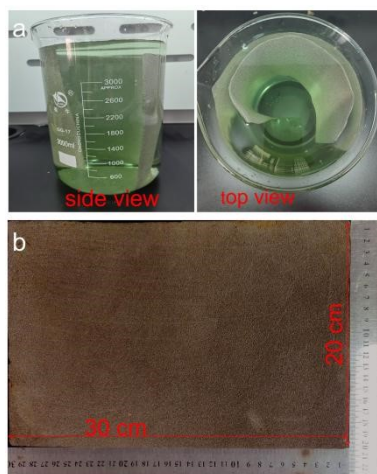

**Figure S1.** Diagram of the preparation process of large-scale electrode, (a) side and top view, (b) photograph of Ni-Fe(OH)<sub>3</sub>/FNF.

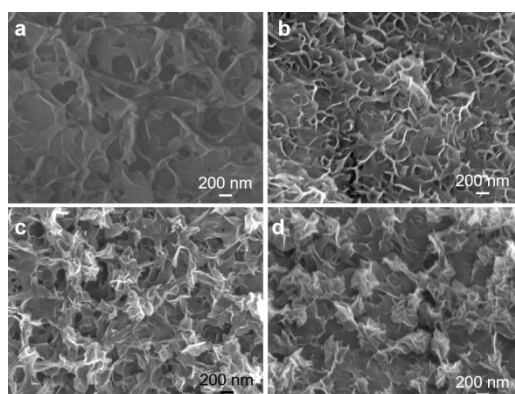

**Figure S2.** SEM images of Ni-Fe(OH)<sub>3</sub>/FNF-n, (a) 4h, (b) 8h, (c) 12h, and (d) 16h.

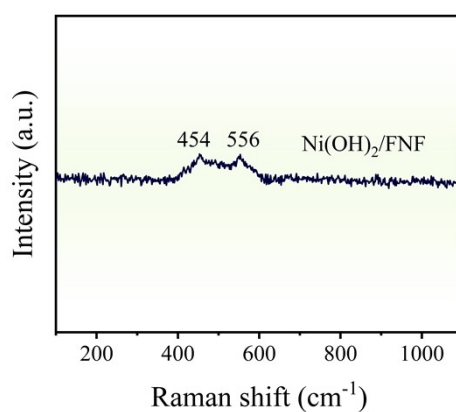

**Figure S3.** Raman spectrum of Ni(OH)<sub>2</sub>/FNF

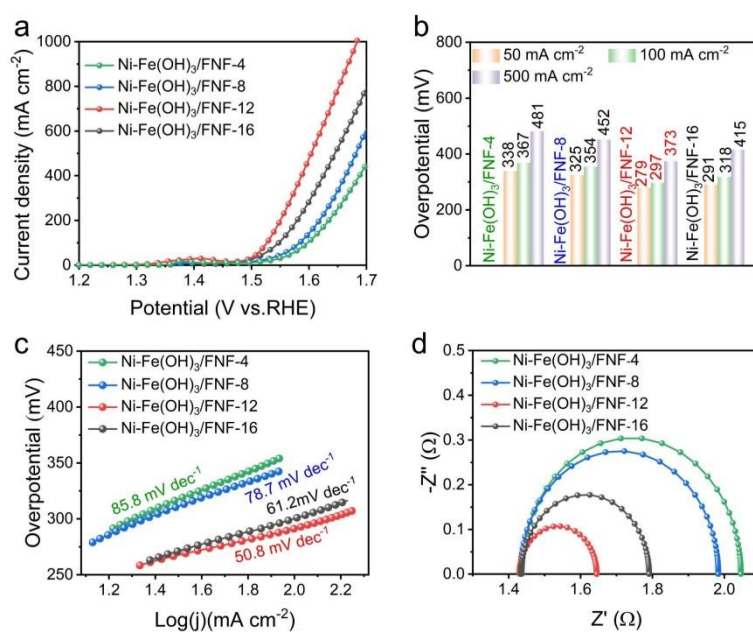

**Figure S4.** OER performance of Ni-Fe(OH)<sub>3</sub>/FNF-n (n=4, 8, 12, and 16 h).

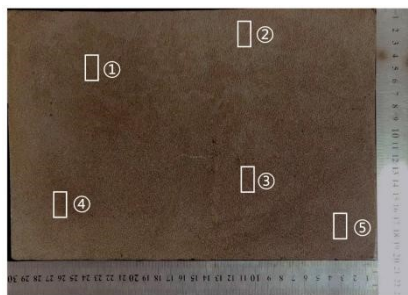

**Figure S5.** Different region of Ni-Fe(OH)<sub>3</sub>/FNF-12.

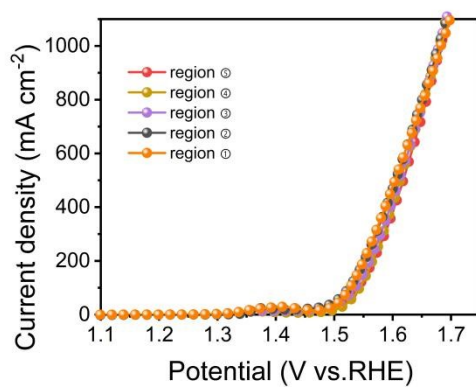

**Figure S6.** LSV curves of different region of Ni-Fe(OH)<sub>3</sub>/FNF-12.

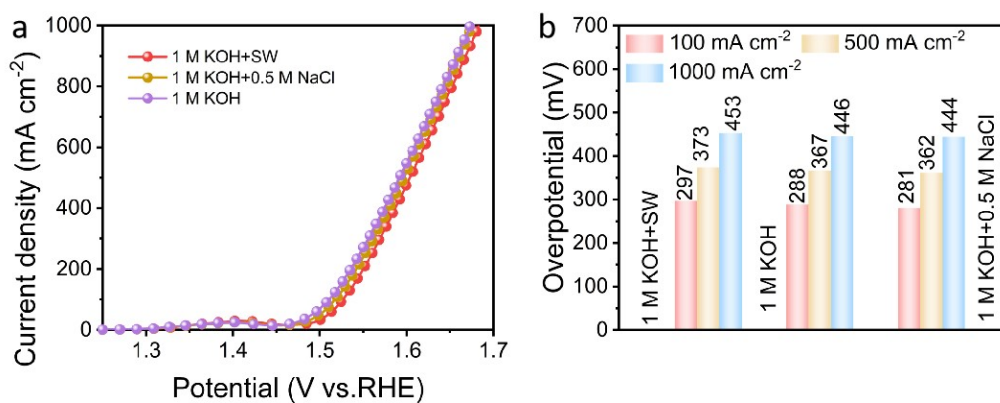

**Figure S7.** OER performance of Ni-Fe(OH)<sub>3</sub>/FNF in different electrolyte. (a) LSV, (b) overpotential.

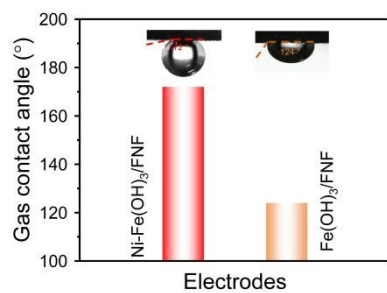

**Figure S8.** Gas contact angle of electrodes.

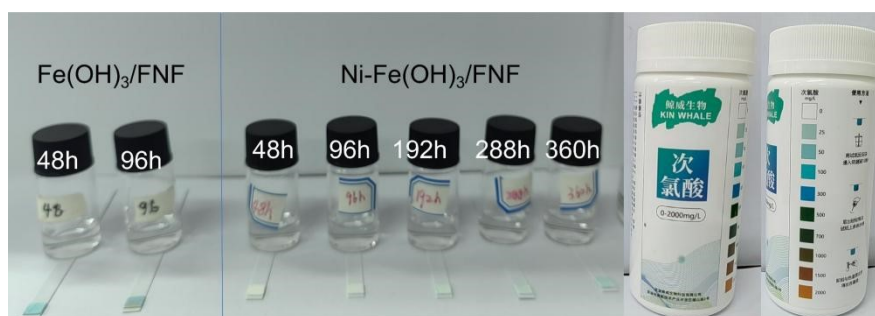

**Figure S9.** Methods for detecting  $\text{ClO}^-$  by the  $\text{ClO}^-$ -indicator.

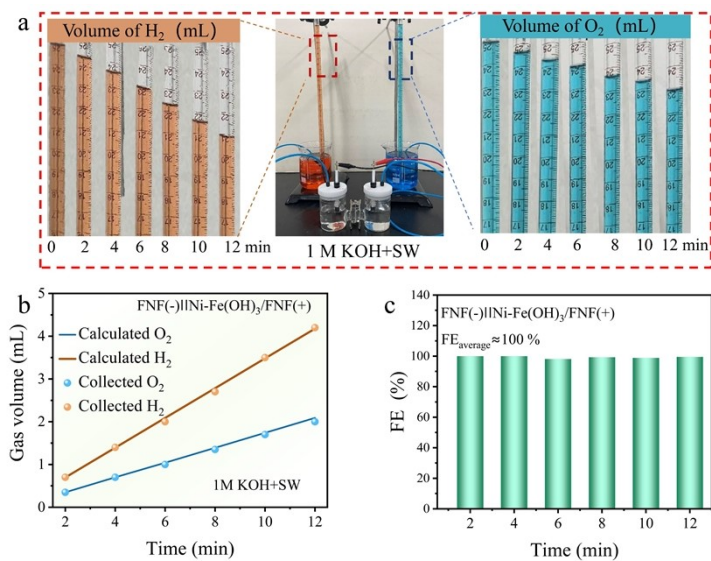

**Figure S10.** Drainage method for Faraday efficiency test: (a) Picture of OWSW drainage test, (b) Gas production with different duration time, (c) Calculated Faraday efficiency.



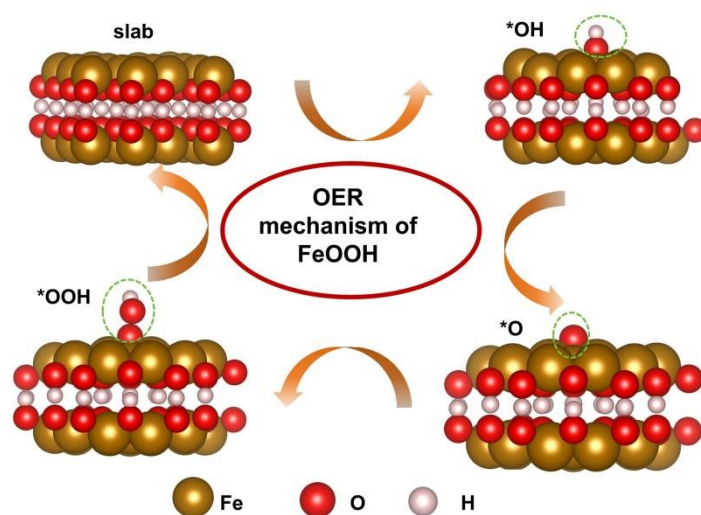

**Figure S11.** OER mechanism of FeOOH at Fe sites.

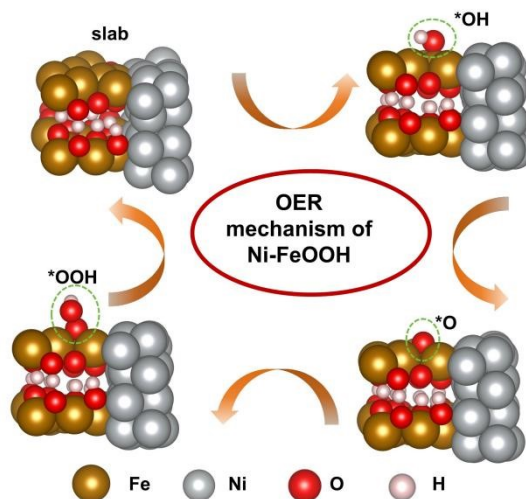

**Figure S12.** OER mechanism of Ni-FeOOH at Fe sites.

Table S1 The XPS peak parameters of Ni-Fe(OH)<sub>3</sub> and Fe(OH)<sub>3</sub>

|                      | Ni-Fe(OH) <sub>3</sub> |              |            | Fe(OH) <sub>3</sub> |              |            |
|----------------------|------------------------|--------------|------------|---------------------|--------------|------------|
|                      | BE<br>(eV)             | FWHM<br>(eV) | assignment | BE<br>(eV)          | FWHM<br>(eV) | assignment |
| Ni 2p <sub>1/2</sub> | 852.7                  | 1.5          | Ni(0)      | —                   | —            | —          |
| Ni 2p <sub>3/2</sub> | 869.9                  | 0.9          | Ni(0)      | —                   | —            | —          |
| Fe2p <sub>1/2</sub>  | 722.4                  | 2.0          | Fe (II)    | 722.5               | 2.0          | Fe (II)    |
| Fe2p <sub>1/2</sub>  | 724.4                  | 2.5          | Fe (III)   | 724.5               | 2.5          | Fe (III)   |
| Fe 2p <sub>3/2</sub> | 709.4                  | 2.0          | Fe (II)    | 709.8               | 2.0          | Fe (II)    |

|                      |       |     |                  |       |     |                  |
|----------------------|-------|-----|------------------|-------|-----|------------------|
| Fe 2p <sub>3/2</sub> | 711.1 | 2.5 | Fe (III)         | 711.4 | 2.5 | Fe (III)         |
| O 1s                 | 529.5 | 1.5 | O-H              | 529.5 | 1.5 | O-H              |
| O 1s                 | 531.1 | 1.6 | O-M              | 531.0 | 1.6 | O-M              |
| O 1s                 | 532.5 | 2.1 | H <sub>2</sub> O | 532.4 | 2.1 | H <sub>2</sub> O |

Table S2 Overpotentials comparison at 500 mA cm<sup>-2</sup> for Ni-Fe(OH)<sub>3</sub>/FNF with reported electrocatalysts in 1 M KOH + seawater.

| Electrocatalysts                                           | $\eta$ (mV) | References |
|------------------------------------------------------------|-------------|------------|
| Ni-Fe(OH) <sub>3</sub> /FNF                                | 373         | This work  |
| Fe-Ni(OH) <sub>2</sub> /Ni <sub>3</sub> S <sub>2</sub> @NF | 390         | [6]        |
| Pt-CoFe( II ) LDH                                          | 375         | [7]        |
| (FeOOH/FeNiCo-LDH/HCNC                                     | 377         | [8]        |
| NH <sub>2</sub> -CoFe MOF                                  | 428         | [9]        |
| Fe-CoCH/NF                                                 | 387         | [10]       |
| Ni <sub>3</sub> FeN@C/NF                                   | 394         | [11]       |
| S-FeOOH/NiOOH                                              | 370         | [12]       |
| S-Ni/Fe(OOH)/NF                                            | 398         | [13]       |
| Fe-NiS/NF                                                  | 420         | [14]       |

## Reference

- [1] S. Hao, Y. Wei, X. Chen, M. Cong, X. Ding, Y. Gao, Amorphous Fe(OH)<sub>3</sub> electro-deposited on 3D cubic MnCO<sub>3</sub> for enhanced oxygen evolution, *Int. J. Hydrogen Energy*, 47 (2022) 17263-17270, <https://doi.org/10.1016/j.ijhydene.2022.03.200>.
- [2] S.-Y. Lee, I.-S. Kim, H.-S. Cho, C.-H. Kim, Y.-K. Lee, Resolving potential-dependent degradation of electrodeposited Ni(OH)<sub>2</sub> catalysts in alkaline oxygen evolution reaction (OER): In situ XANES studies, *Appl. Catal. B Environ.*, 284 (2021) 119729, <https://doi.org/10.1016/j.apcatb.2020.119729>.
- [3] G. Kresse, J. Hafner, Ab initio molecular dynamics for liquid metals, *Physical Review B*, 47 (1993) 558-561, <https://doi.org/10.1103/PhysRevB.47.558>.
- [4] G. Kresse, D. Joubert, From ultrasoft pseudopotentials to the projector augmented-wave method, *Physical Review B*, 59 (1999) 1758-1775, <https://org.doi/10.1103/PhysRevB.59.1758>.
- [5] J.P. Perdew, K. Burke, M. Ernzerhof, Generalized gradient approximation made simple, *Physical Review Letters*, 77 (1996) 3865-3868, <https://doi.org/10.1103/PhysRevLett.77.3865>.
- [6] B. Cui, Z. Hu, C. Liu, S. Liu, F. Chen, S. Hu, J. Zhang, W. Zhou, Y. Deng, Z. Qin, Z. Wu, Y. Chen, L. Cui, W. Hu, Heterogeneous lamellar-edged Fe-Ni(OH)<sub>2</sub>/Ni<sub>3</sub>S<sub>2</sub> nanoarray for efficient and stable

- seawater oxidation, *Nano Res.*, 14 (2021) 1149-1155, <https://doi.org/10.1007/s12274-020-3164-3>.
- [7] J. Wu, Z. Nie, R. Xie, X. Hu, Y. Yu, N. Yang, Self-assembled Pt–CoFe layered double hydroxides for efficient alkaline water/seawater splitting by spontaneous redox synthesis, *Journal of Power Sources*, 532 (2022) 231353, <https://doi.org/10.1016/j.jpowsour.2022.231353>.
- [8] Y. Luo, Y. Yang, Y. Tian, Q. Wu, W.-F. Lin, M. Wen, Collaborative reconstruction of FeOOH/FeNiCo-LDH heterogeneous nanosheets for enhancing anion exchange membrane seawater electrolysis, *J. Mater. Chem. A*, 13 (2025) 7136-7148, <http://doi.org/10.1039/D4TA08586H>.
- [9] D.H. Kim, J. Moon, S.Y. Lee, H.J. An, H. Jeong, J.T. Park, Fe-modulated NH<sub>2</sub>-CoFe MOF nanosheet arrays on nickel foam by cation exchange reaction for an efficient OER electrocatalyst at high current density in alkaline water/seawater, *CrystEngComm*, 25 (2023) 5387-5398, <http://doi.org/10.1039/D3CE00728F>.
- [10] S. Shi, S. Sun, X. He, L. Zhang, H. Zhang, K. Dong, Z. Cai, D. Zheng, Y. Sun, Y. Luo, Q. Liu, B. Ying, B. Tang, X. Sun, W. Hu, Improved electrochemical alkaline seawater oxidation over cobalt carbonate hydroxide nanowire array by iron doping, *Inorg. Chem.*, 62 (2023) 11746-11750, <https://doi.org/10.1021/acs.inorgchem.3c01473>.
- [11] B. Wang, M. Lu, D. Chen, Q. Zhang, W. Wang, Y. Kang, Z. Fang, G. Pang, S. Feng, Ni<sub>x</sub>Fe<sub>y</sub>N@C microsheet arrays on Ni foam as an efficient and durable electrocatalyst for electrolytic splitting of alkaline seawater, *J. Mater. Chem. A*, 9 (2021) 13562-13569, <http://doi.org/10.1039/D1TA01292D>.
- [12] X. Sun, Z. Xu, Q. Shi, X. Ma, S. Lin, Sulfur-doped FeOOH/NiOOH electrocatalyst with enhanced activity and stability for ampere-level seawater oxidation, *Electrochim. Acta*, 536 (2025) 146770, <https://doi.org/10.1016/j.electacta.2025.146770>.
- [13] J. Liu, J. Yang, Y. Song, J. Sun, Y. Tian, Q. Chen, X. Zhang, L. Zhang, Introducing non-bridging ligand in metal-organic framework-based electrocatalyst enabling reinforced oxygen evolution in seawater, *J. Colloid Interface Sci.*, 643 (2023) 17-25, <https://doi.org/10.1016/j.jcis.2023.04.009>.
- [14] C. Yang, K. Dong, L. Zhang, X. He, J. Chen, S. Sun, M. Yue, H. Zhang, M. Zhang, D. Zheng, Y. Luo, B. Ying, Q. Liu, A.M. Asiri, M.S. Hamdy, X. Sun, Improved alkaline seawater splitting of NiS nanosheets by iron doping, *Inorg. Chem.*, 62 (2023) 7976-7981, <https://doi.org/10.1021/acs.inorgchem.3c00836>.
